# Supplementary material
Source: PubMed Central journal article supplement (PMC4958233)
Supplement: AAC.00317-16_zac008165345so1.pdf [file AAC.00317-16_zac008165345so1.pdf]

# 1 The Antifungal Properties of Cationic Phenylene Ethynylenes and their Impact on $\beta$ -Glucan

## 2 Exposure

3

4 Harry C. Pappas<sup>†,‡</sup>, Rina Sylejmani<sup>§,‡</sup>, Matthew S. Graus<sup>†,‡</sup>, Patrick L. Donabedian<sup>†,§</sup>, David G.

5 Whitten<sup>§</sup>, and Aaron K. Neumann<sup>‡</sup>

6

7 <sup>†</sup> Department of Nanoscience & Microsystems Engineering, University of New Mexico

8 <sup>‡</sup> Department of Pathology, University of New Mexico School of Medicine

9 <sup>§</sup> Department of Chemical & Biological Engineering, University of New Mexico

0

## 1 Supplemental Information

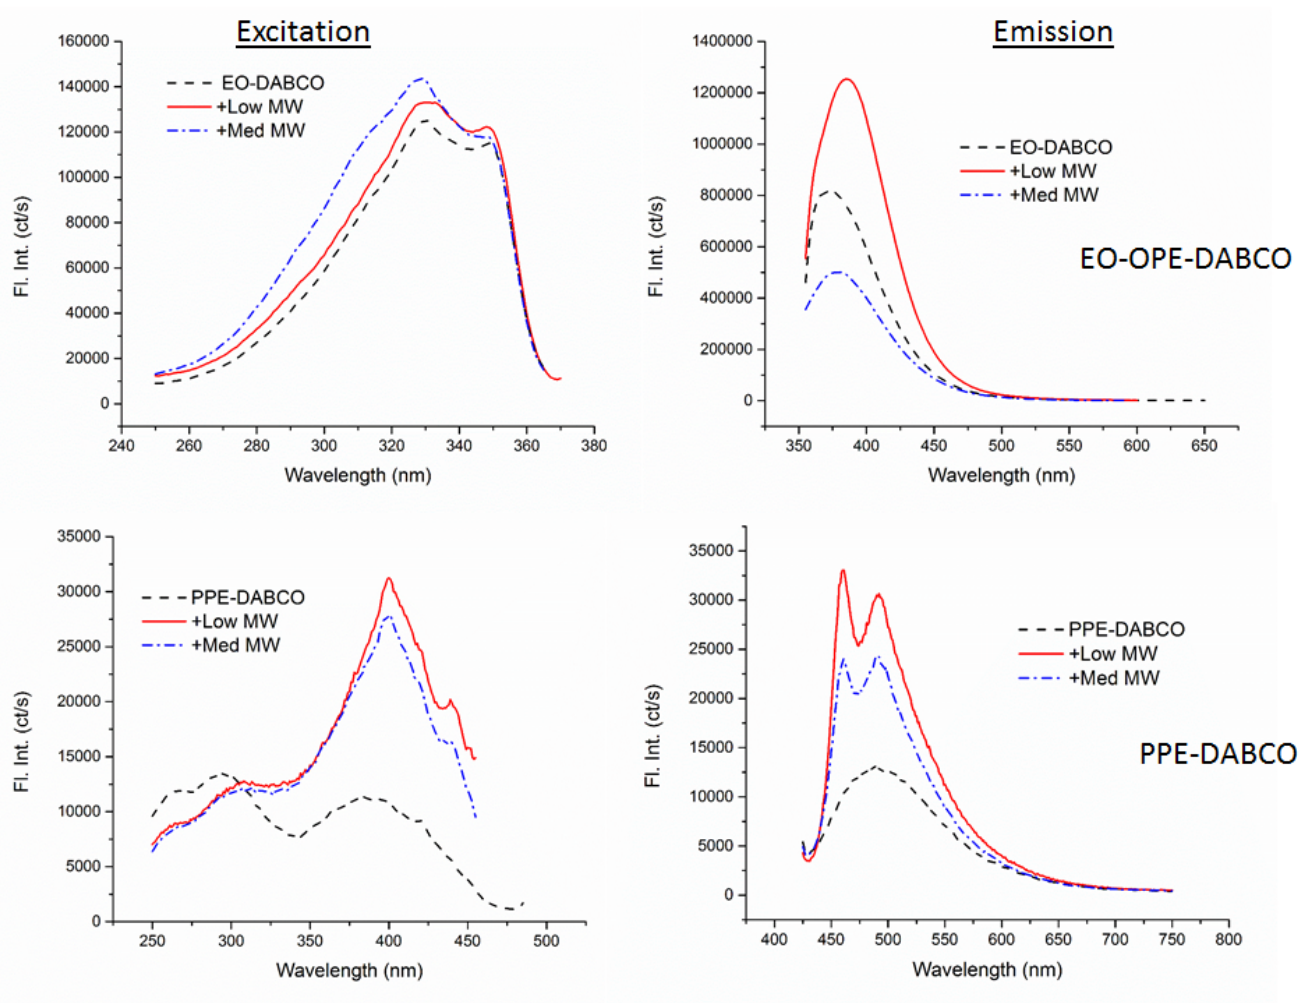

2

3 **Figure S1:** Spectroscopy of low and medium molecular weight  $\beta$ -glucan.

4

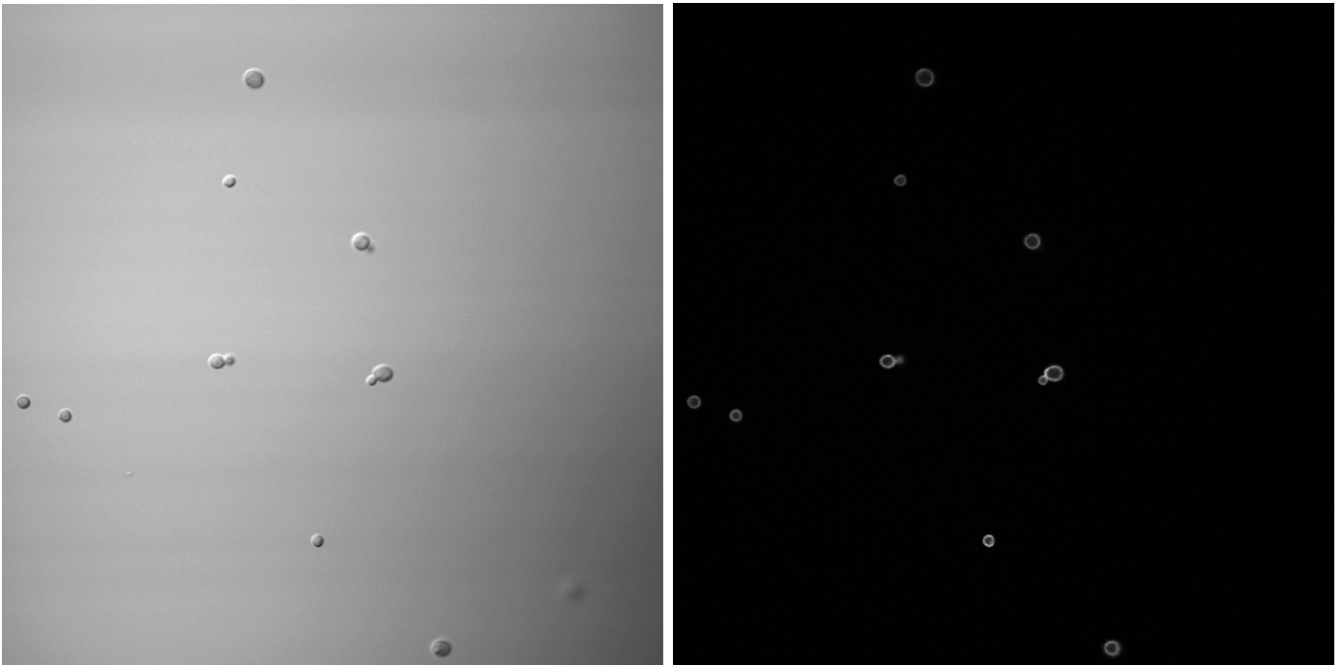

5

6 **Figure S2:** Confocal microscopy images illustrate the presence of PPE-DABCO on the cell wall of *C.*  
7 *albicans* yeast cells. A transmitted light image (left) and reflected light image (right) are shown, with  
8 405 nm excitation being used to generate fluorescence of bound PPE-DABCO.

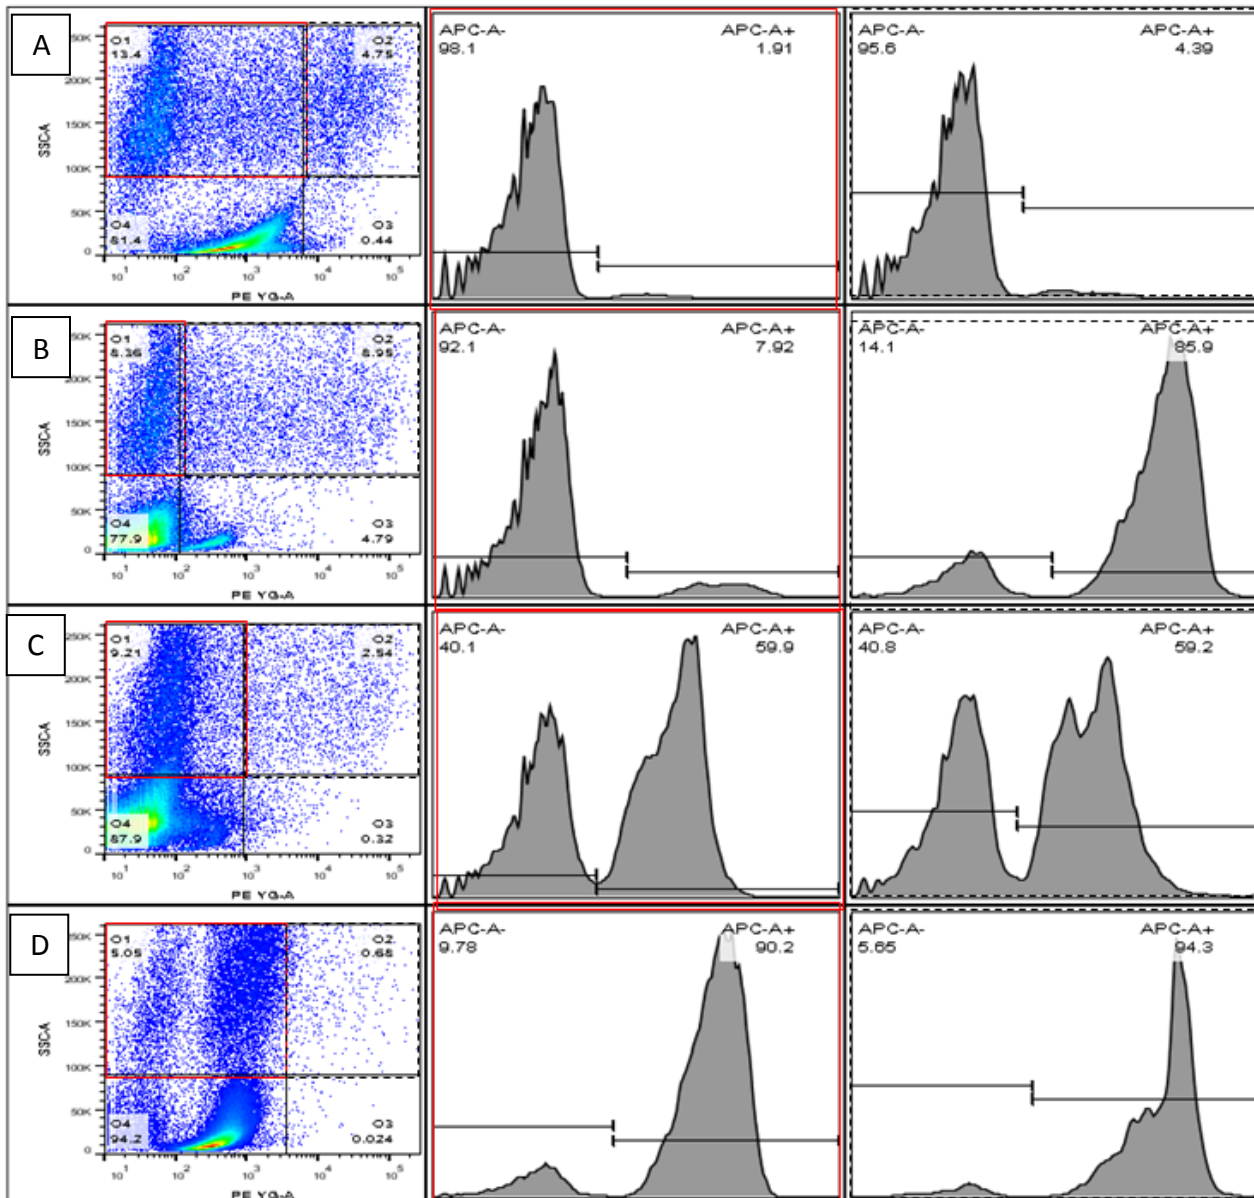

9

0 **Figure S3:** Gating scheme used to quantify yeast cell interaction with a HEK-293 cell, as well as  
 1 internalization. Row A: Light NC; Row B: Heat PC; Row C: PPE-Dark; Row D: PPE-Light.

2 Red Gate encompasses events that are SSC+ and mApple-, and represent all HEK 293 cells that  
 3 were not successfully transfected, and therefore do not express Dectin-1. The Green Gate  
 4 encompasses events that are SSC+ and mApple+, and represent all HEK-293 cells that were  
 5 successfully transfected, and therefore do express Dectin-1. Of all events falling under the red or  
 6 green gates, those that are CypHer 5- are assumed to be non-transfected HEK cells that are not

- 7 interacting with a *C. albicans* yeast cell; those that are CypHer 5+ are interacting with at least one *C.*
- 8 *albicans* yeast cell.
